# Supplementary material for: Automation of surgical skill assessment using a three-stage machine learning algorithm
Source: PubMed Central journal article supplement (PMC7933408; doi:10.1038/s41598-021-84295-6), 2021-03-04
Supplement: 41598_2021_84295_MOESM1_ESM.pdf [file 41598_2021_84295_MOESM1_ESM.pdf]

# **Automation of Surgical Skill Assessment Using a Three-Stage Machine Learning Algorithm**

Joël L. Lavanchy<sup>1</sup>, Joel Zindel<sup>1</sup>; Kadir Kirtac<sup>2</sup>; Isabell Twick<sup>2</sup>; Enes Hosgor<sup>2</sup>; Daniel Candinas<sup>1</sup>; Guido Beldi<sup>1</sup>

1 Department of Visceral Surgery and Medicine, Inselspital, Bern University Hospital, University of Bern, CH-3010 Bern, Switzerland

2 Caresyntax, Komturstr. 18A, D-12099 Berlin, Germany

## Supplementary Information

**Table S1.** Definitions of skill rating

| Rating | Definition                                                                                                        |
|--------|-------------------------------------------------------------------------------------------------------------------|
| 5      | Clip was applied in the right position in a straight manner and the tip of the clip was visualized before closure |
| 4      | Clip was applied in the right position, movement was steady but slow                                              |
| 3      | Clip was applied in the right position, but movement was hesitating and/or jittering                              |
| 2      | Clip was applied in the wrong position and/or with shaky movements                                                |
| 1      | Clip was lost or not applied at all                                                                               |

**Table S2.** Definition of the extracted clipper motion features

| Feature name                               | Explanation                                                                                                                                                |
|--------------------------------------------|------------------------------------------------------------------------------------------------------------------------------------------------------------|
| Count                                      | Number of frames the clipper was detected in the video snippet                                                                                             |
| Distance                                   | Distance travelled by the clipper throughout the video snippet                                                                                             |
| Centroid x,<br>Centroid y                  | X and y coordinates of the location centroid (= the centre of all the clipper locations throughout the video snippet)                                      |
| Radius 66%,<br>Radius 99%                  | Clipper movement radius around its centroid. (Radius 66%/99% refers to the radius from the centroid for the 66%/99% closest location points, respectively) |
| Direction change                           | Percentage of clipper direction changes of 45° or more throughout the video snippet                                                                        |
| Longest constant direction (LCD)           | Longest consecutive clipper path without direction changes of more than 45°                                                                                |
| Position change 1%,<br>Position change 10% | Percentage of clipper location changes of 1 and 10% with respect to the image width/heights                                                                |

**Figure S1.** **a** Illustration of the Likert scale used to rate surgical skills: The minimum score 1 indicates poor surgical skill, the maximum score indicates 5 excellent surgical skill. **b** Distribution of human skills ratings in the dataset.

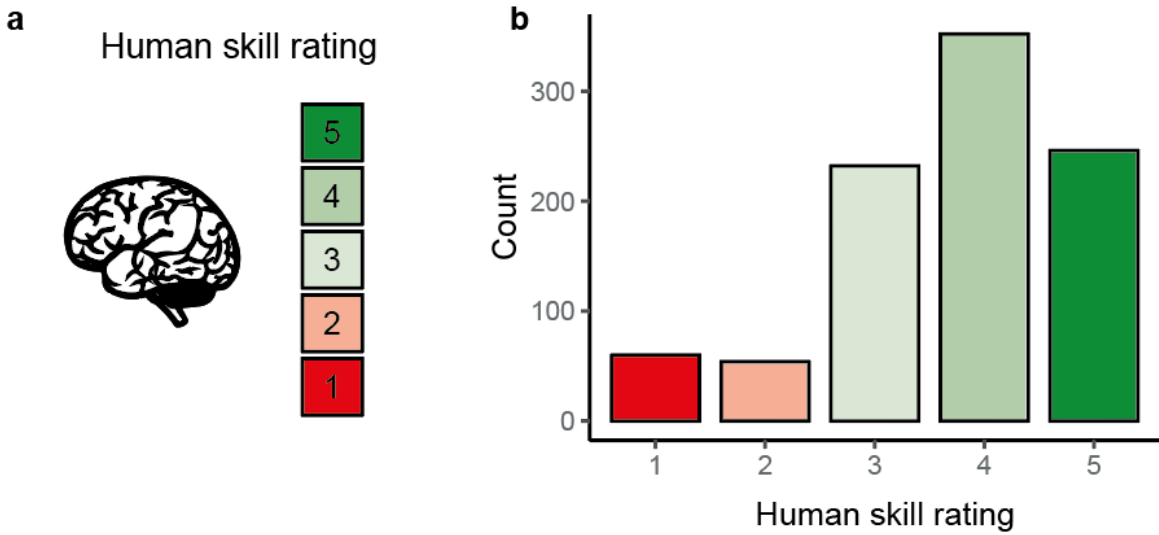

**Figure S2.** Visualization of the extracted clipper motion features

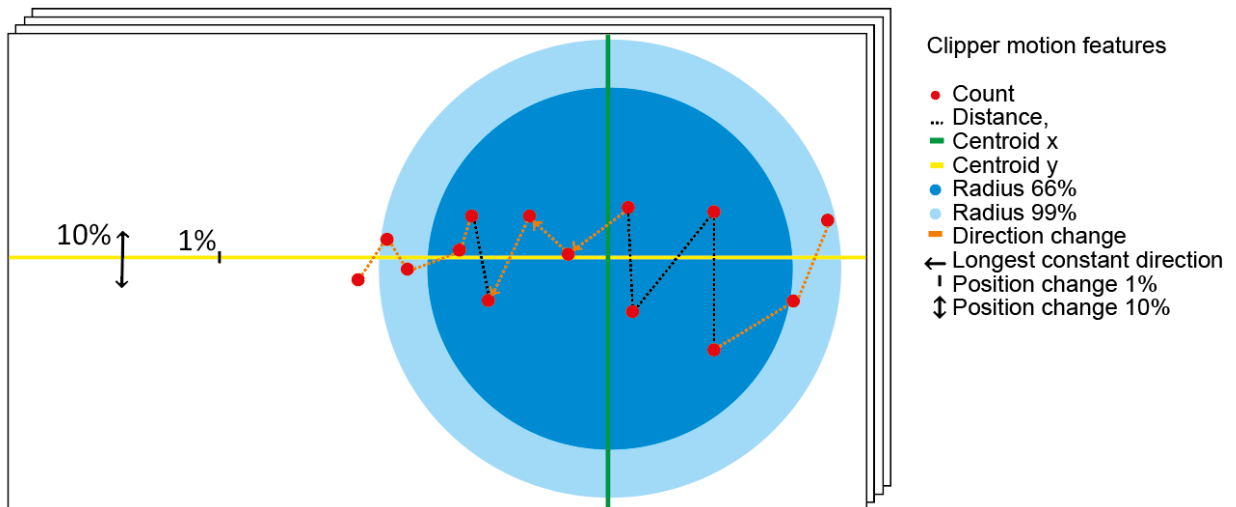

**Figure S3.** Example frames where the instrument detection model succeeded. True positive grasper identification **a** despite heavy smoke **b** and despite other instrument (scissor) visible. True positive clipper identification **c** despite partial occlusion of the clipper, **d** despite full occlusion of the clipper, **e** despite bad bad angle **f** and despite difficult angle and blur.

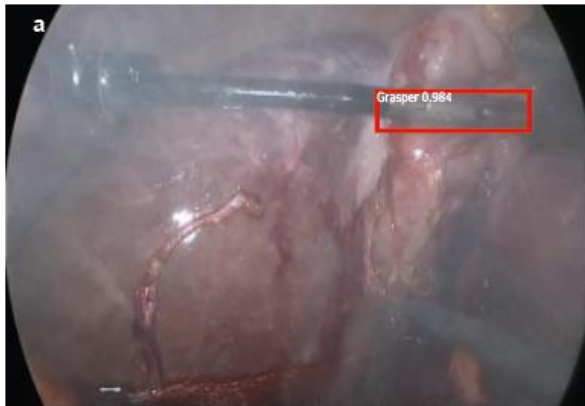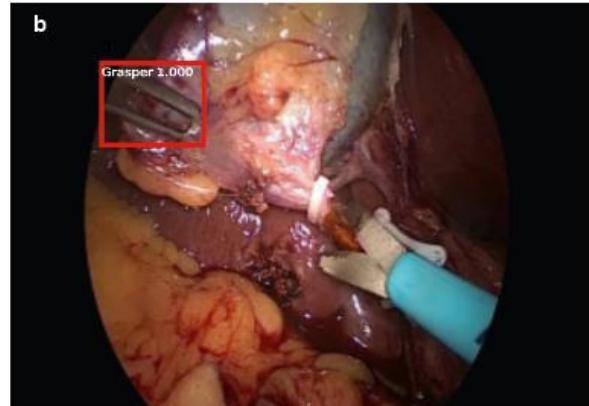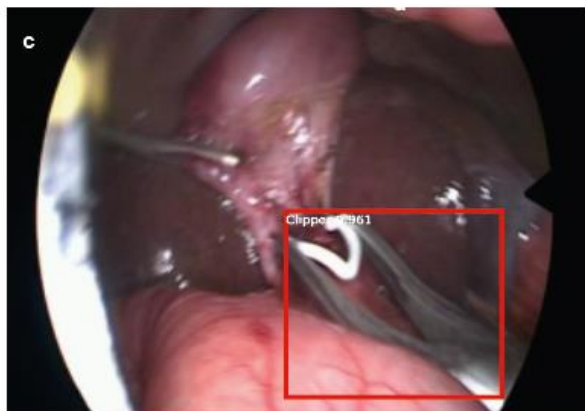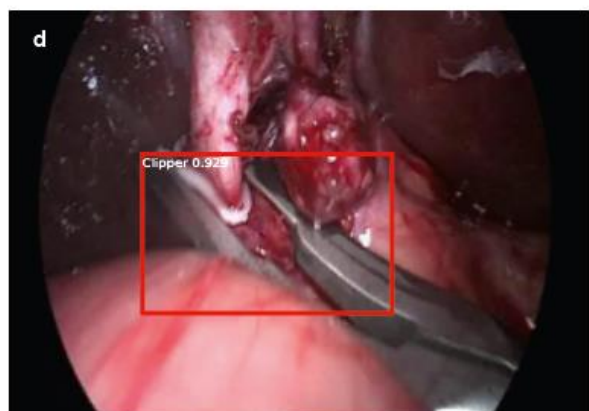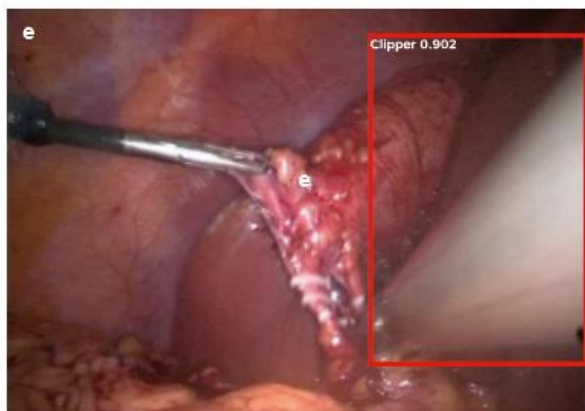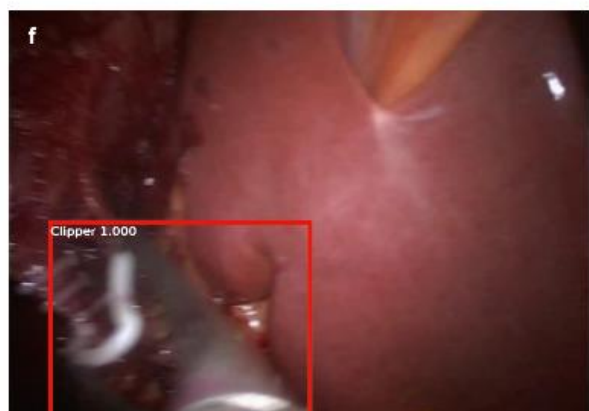

**Figure S4.** Example frames where the instrument detection model failed. **a** False negative clipper detection due to bad angle and blur **b** False negative grasper detection due to multiple visible graspers **c** False positive clipper identification **d** False negative B.Braun Aesculap clipper detection **e** False negative Teleflex Hem-o-lok clipper detection **f** False negative clipper identification due to clipper occlusion.

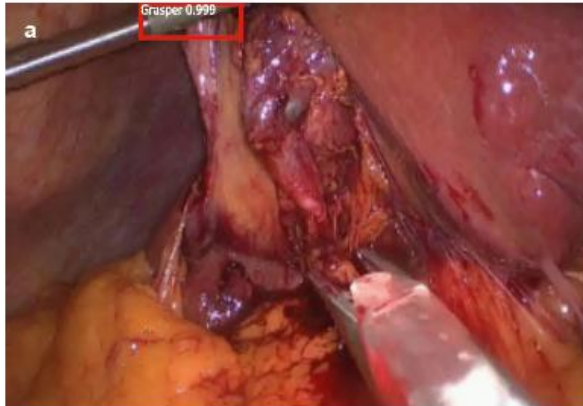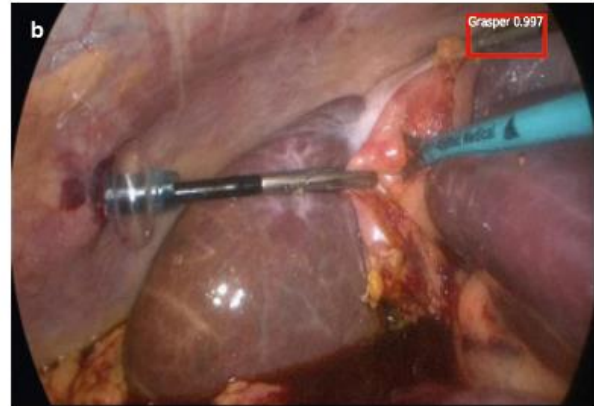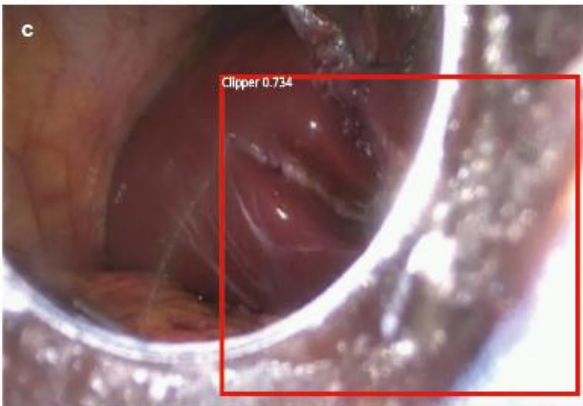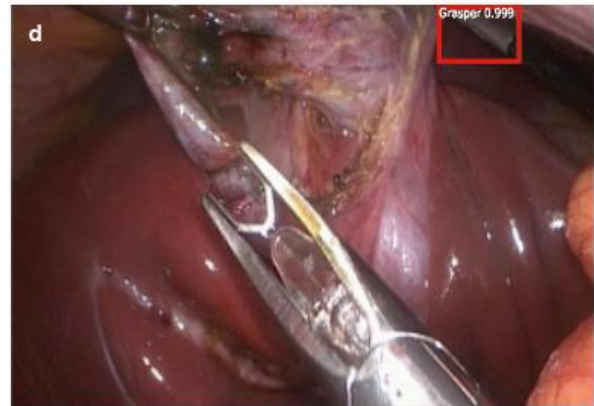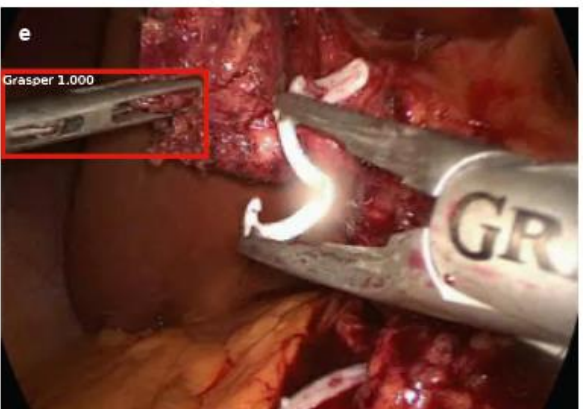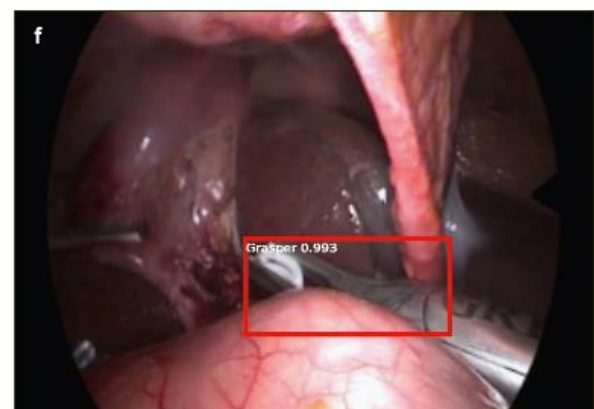

**Video S1.** Example video snippet with instrument detection algorithm. Instruments are labeled with predicted bounding boxes, class labels and prediction accuracies

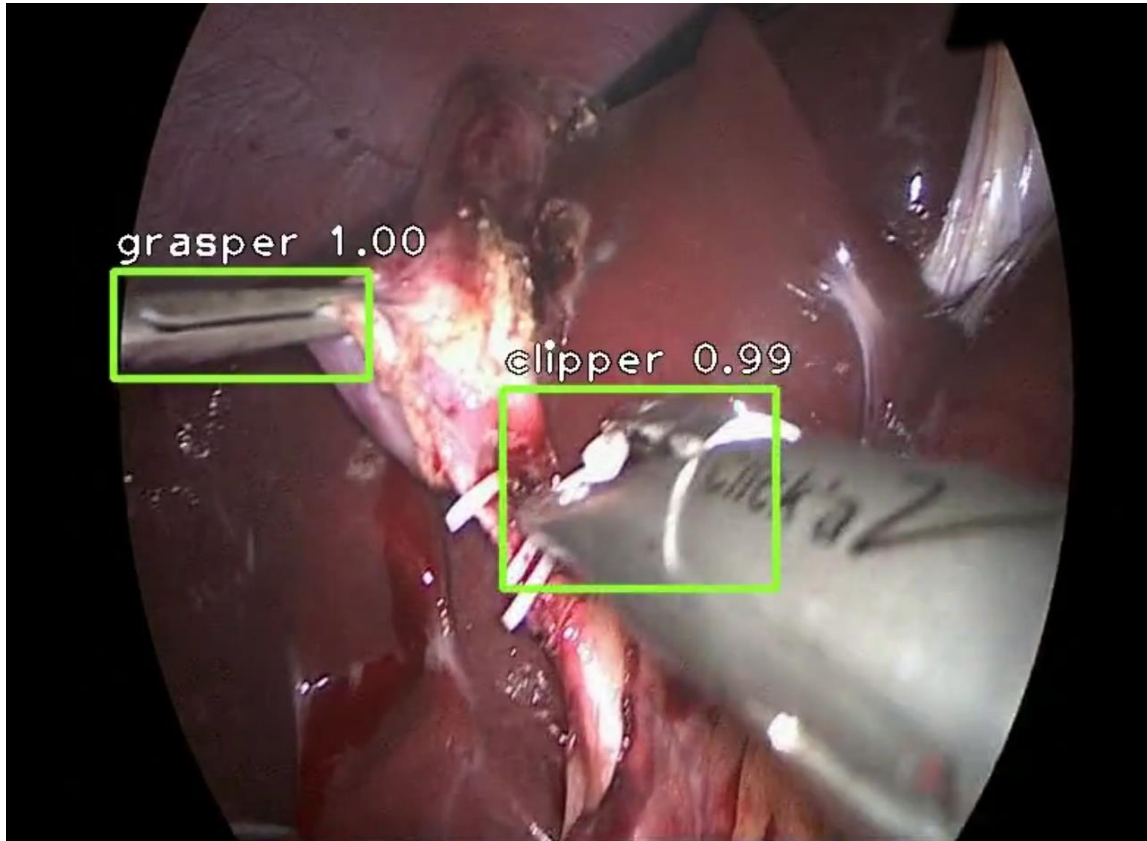

Filename: *motion\_tracking\_25fps.mp4*
